# Supplementary material for: Effect of Upper Airway Stimulation in Patients with Obstructive Sleep Apnea (EFFECT): A Randomized Controlled Crossover Trial
Source: MDPI journal article supplement (doi:10.3390/jcm10132880), 2021-06-29
Supplement: s1 [file s1]

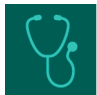

**Supplementary Materials:** The following are available online at <https://www.mdpi.com/article/10.3390/jcm10132880/s1>, **Figure S1:** Study flow of participants from baseline through completion after the 2-week visit, **Table S1:** Sleep Architectural Differences in Response to Upper Airway Stimulation versus Sham. **Table S2:** Sleep Architectural Differences in Response to Upper Airway Stimulation versus Sham

**Figure S1:** Study flow of participants from baseline through completion after the 2-week visit.

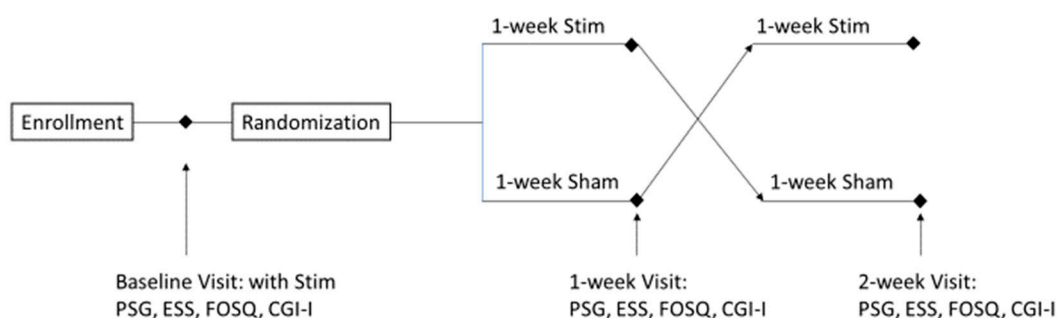

**Table S1:** Sleep Architectural Differences in Response to Upper Airway Stimulation versus Sham. Mean (95% CI)

| Parameter                                         | Stim              | Sham              | Difference           | p-value |
|---------------------------------------------------|-------------------|-------------------|----------------------|---------|
| AHI (events per hour)                             | 0.6 (-1.8, 2.9)   | 16.1 (13.7, 18.4) | -15.5 (-18.3, -12.8) | <.001   |
| ODI (events per hour)                             | 0.6 (-1.9, 3.0)   | 12.7 (10.3, 15.2) | -12.2 (-14.8, -9.6)  | <.001   |
| Total time in bed (in hours)                      | 5.8 (-6.5, 18.2)  | 5.4 (-6.9, 17.7)  | 0.4 (-12.2, 13.0)    | 0.948   |
| Total sleep time (in hours)                       | 3.3 (-9.3, 16.0)  | 11.6 (-1.1, 24.2) | -8.2 (-23.3, 6.9)    | 0.282   |
| Sleep efficiency (in %)                           | 0.2 (-2.2, 2.5)   | 2.5 (0.1, 4.9)    | -2.3 (-5.4, 0.7)     | 0.129   |
| N1 total duration (in minutes)                    | -3.8 (-9.0, 1.4)  | 2.2 (-3.0, 7.4)   | -6.0 (-11.2, -0.8)   | 0.024   |
| N2 total duration (in minutes)                    | 7.3 (-34.7, 49.3) | 42.9 (0.9, 84.9)  | -35.6 (-90.9, 19.7)  | 0.204   |
| N3 total duration of slow wave sleep (in minutes) | 2.4 (-6.8, 11.5)  | -1.5 (-10.6, 7.7) | 3.9 (-7.3, 15.0)     | 0.494   |
| REM total duration (in minutes)                   | 0.2 (-4.8, 5.3)   | 0.7 (-4.3, 5.8)   | -0.5 (-5.2, 4.2)     | 0.834   |
| WAKE total duration (in minutes)                  | -5.3 (-17.5, 6.9) | -5.7 (-17.9, 6.6) | 0.4 (-13.9, 14.7)    | 0.958   |
| Apnoea index (in events per hour)                 | 0.5 (-1.2, 2.3)   | 8.9 (7.2, 10.7)   | -8.4 (-10.6, -6.2)   | <.001   |

| Parameter                                       | Stim               | Sham               | Difference           | p-value |
|-------------------------------------------------|--------------------|--------------------|----------------------|---------|
| AHI in supine position in events per hour)      | 2.2 (-2.3, 6.6)    | 23.8 (19.4, 28.2)  | -21.6 (-27.2, -16.0) | <.001   |
| Sleep time in supine position (in minutes)      | -11.7 (-29.9, 6.6) | -10.3 (-28.6, 7.9) | -1.4 (-22.9, 20.1)   | 0.898   |
| AHI in non-supine position (in minutes)         | -0.1 (-3.2, 2.9)   | 3.1 (0.1, 6.1)     | -3.3 (-6.4, -0.1)    | 0.044   |
| Sleep time in non-supine position (in minutes)  | 4.5 (-25.5, 34.5)  | 1.9 (-28.4, 32.3)  | 2.6 (-30.6, 35.8)    | 0.876   |
| AHI in REM sleep (events per hour)              | 2.0 (-1.6, 5.6)    | 17.1 (13.5, 20.6)  | -15.1 (-19.7, -10.5) | <.001   |
| AHI in non-REM sleep (events per hour)          | 0.0 (-2.4, 2.5)    | 15.7 (13.3, 18.2)  | -15.7 (-18.5, -12.8) | <.001   |
| Central Apnoea Index (events per hour)          | 0.1 (-0.1, 0.4)    | 0.3 (0.0, 0.5)     | -0.1 (-0.4, 0.1)     | 0.285   |
| Mixed Apnoea Index (events per hour)            | 0.1 (-0.3, 0.4)    | 0.3 (-0.1, 0.6)    | -0.2 (-0.6, 0.2)     | 0.355   |
| Central Mixed Apnoea Index (events per hour)    | -0.0 (-0.8, 0.7)   | 0.4 (-0.3, 1.1)    | -0.4 (-1.2, 0.4)     | 0.283   |
| Hypopnoea Index (events per hour)               | 0.0 (-1.6, 1.6)    | 7.0 (5.4, 8.6)     | -7.0 (-8.9, -5.1)    | <.001   |
| Percentage of Central/Mixed of total AHI (in %) | 0.4 (-2.0, 2.9)    | 0.5 (-1.9, 3.0)    | -0.1 (-2.7, 2.6)     | 0.955   |
| Minimal measured SaO <sub>2</sub> (in %)        | -0.9 (-1.9, 0.2)   | -4.0 (-5.0, -3.0)  | 3.1 (2.1, 4.2)       | <.001   |
| Mean SaO <sub>2</sub> (in %)                    | -0.2 (-0.9, 0.4)   | -0.5 (-1.2, 0.1)   | 0.3 (-0.5, 1.1)      | 0.493   |
| Total time SaO <sub>2</sub> <90%                | 2.4 (-1.7, 6.4)    | 9.0 (4.9, 13.0)    | -6.6 (-11.2, -2.0)   | 0.005   |
| Percentage of TIB SaO <sub>2</sub> <90%         | 0.3 (-1.0, 1.5)    | 2.3 (1.0, 3.5)     | -2.0 (-3.3, -0.7)    | 0.004   |
| Arousal Index (events per hour)                 | 1.9 (-1.1, 4.8)    | 2.2 (-0.7, 5.2)    | -0.3 (-4.2, 3.5)     | 0.861   |

**Table S2:** The Clinical Global Impression Changes in Response to Upper Airway Stimulation versus Sham

| CGI by Treatment Group        | % (n/N)       |
|-------------------------------|---------------|
| <b>Stim</b>                   |               |
| <i>1 - Very much improved</i> | 39.5% (34/86) |
| <i>2 - Much improved</i>      | 27.9% (24/86) |
| <i>3 - Minimally improved</i> | 9.3% (8/86)   |
| <i>4 - No change</i>          | 19.8% (17/86) |
| <i>5 - Minimally worse</i>    | 3.5% (3/86)   |
| <b>Sham</b>                   |               |
| <i>1 - Minimally improved</i> | 2.3% (2/87)   |
| <i>2 - No change</i>          | 6.9% (6/87)   |
| <i>3 - Minimally worse</i>    | 19.5% (17/87) |
| <i>4 - Much worse</i>         | 37.9% (33/87) |
| <i>5 - Very much worse</i>    | 33.3% (29/87) |

CGI=clinical global impression.
